# Supplementary material for: Childcare Food Provision Recommendations Vary across Australia: Jurisdictional Comparison and Nutrition Expert Perspectives
Source: MDPI journal article supplement (doi:10.3390/ijerph17186793), 2020-09-17
Supplement: s1 [file s1]

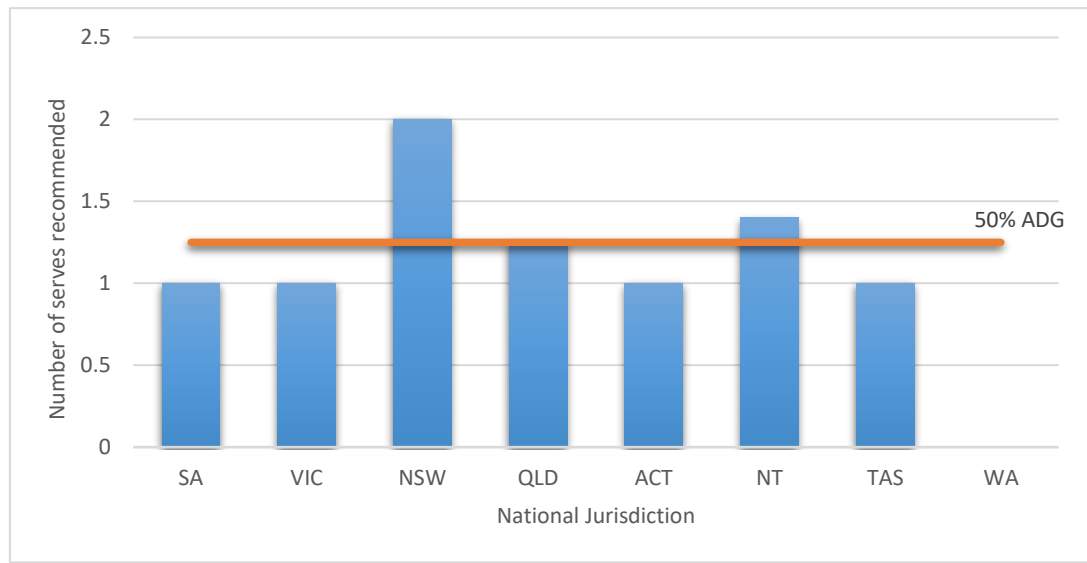

**Supplementary Figure 1.** Example graphical representation: Jurisdictional serve recommendations for Vegetables in LDCs for 2-3 year olds (1 1/4 serves = 50% ADG)

**Supplementary Table 1.** Additional LDC menu planning guidelines identified across Australian jurisdictions

|                                       | ACT                                                                                                                | NSW                                                                                                                                                                                                                               | NT                                                      | QLD | SRER - SA                                                                                                                     | TAS                                                                                                                                                                                                                                                                                                                                             | VIC (Healthy Eating Advisory Service)                                                                                                                                                                                                                   |
|---------------------------------------|--------------------------------------------------------------------------------------------------------------------|-----------------------------------------------------------------------------------------------------------------------------------------------------------------------------------------------------------------------------------|---------------------------------------------------------|-----|-------------------------------------------------------------------------------------------------------------------------------|-------------------------------------------------------------------------------------------------------------------------------------------------------------------------------------------------------------------------------------------------------------------------------------------------------------------------------------------------|---------------------------------------------------------------------------------------------------------------------------------------------------------------------------------------------------------------------------------------------------------|
| <b>Meat/alternatives</b>              |                                                                                                                    |                                                                                                                                                                                                                                   |                                                         |     |                                                                                                                               | Lean ham or bacon <u>may</u> be included on menu once or twice per week ( <i>either once as a major ingredient and once as a minor ingredient, or twice as a minor ingredient</i> )<br><br>Lean sausages may be included on the menu no more than once each month.<br>Lean ham, bacon and sausages are not offered on the menu on the same day. | Lean ham or bacon <u>may</u> be included on menu once or twice per week ( <i>either once as a major ingredient and once as a minor ingredient, or twice as a minor ingredient</i> )                                                                     |
| <i>Red meat: beef, lamb, kangaroo</i> | ...included on the menu at least 3 times per week                                                                  | .. included on the menu at least 6 times per fortnight<br><br>On each day that a red meat meal is served, at least 1 other iron-containing food is included on the menu e.g. wholemeal bread, breakfast cereal, dried fruit, milo | Include lean red meat on the menu twice a week          |     | .. included on the menu at least 4 times per fortnight (1 serve = 50g raw)                                                    | ...included on the menu at least 4 times each fortnight                                                                                                                                                                                                                                                                                         | .. included on the menu at least 4 times per fortnight                                                                                                                                                                                                  |
| <i>Pork, poultry, fish</i>            | White meat (skinless chicken, fish and pork) and non-meat meals are included on the menu at least 2 times per week | A variety of lean white ( <u>chicken/fish/pork/veal</u> ) /non-meat meals are included on the menu up to 4 times per fortnight                                                                                                    | Include lean white meat on the menu 3 times a fortnight |     | <u>Pork</u> or white meat: <u>chicken/fish/veal</u><br>Lean white meat is included on the menu at least 3 times per fortnight | Lean pork or poultry is included on the menu at least 2 times each fortnight.<br><br>Fish is included on the menu 1-2 times each fortnight                                                                                                                                                                                                      | Lean <u>pork or poultry</u> is included on the menu at least 2 times per fortnight<br>Lean ham or bacon is allowed up to twice a week as a minor ingredient or once as a major ingredient<br><u>Fish</u> is included on the menu 1- times per fortnight |

|                         |                                                                                                                                                                                 |                                                                                                                                                                                                                                                                                                                                      |                                                                                                                                                                                                                                                                                                                                                      |                                                                                                                                                                                                                                                                                                                                                                         |                                                                                                                                                                                                                                                                                                                                                                                                                                                                            |                                                                                                                                                                                                                                                                                                                                                                |
|-------------------------|---------------------------------------------------------------------------------------------------------------------------------------------------------------------------------|--------------------------------------------------------------------------------------------------------------------------------------------------------------------------------------------------------------------------------------------------------------------------------------------------------------------------------------|------------------------------------------------------------------------------------------------------------------------------------------------------------------------------------------------------------------------------------------------------------------------------------------------------------------------------------------------------|-------------------------------------------------------------------------------------------------------------------------------------------------------------------------------------------------------------------------------------------------------------------------------------------------------------------------------------------------------------------------|----------------------------------------------------------------------------------------------------------------------------------------------------------------------------------------------------------------------------------------------------------------------------------------------------------------------------------------------------------------------------------------------------------------------------------------------------------------------------|----------------------------------------------------------------------------------------------------------------------------------------------------------------------------------------------------------------------------------------------------------------------------------------------------------------------------------------------------------------|
|                         |                                                                                                                                                                                 | On each day that a white meat meal is served at least 2 other iron-containing foods are included on the menu e.g wholemeal bread, breakfast cereal, dried fruit, milo                                                                                                                                                                | Iron containing foods to be included when serving a white meat or vegetarian dish, such as wholemeal bread, spinach, broccoli, cauliflower, beans such as baked beans and lentils.                                                                                                                                                                   | Served with at least 1 other iron containing food such as .... Spinach, legumes (baked beans and lentils), wholemeal bread, broccoli, spinach, cauliflower, cabbage                                                                                                                                                                                                     |                                                                                                                                                                                                                                                                                                                                                                                                                                                                            |                                                                                                                                                                                                                                                                                                                                                                |
| <i>Vegetarian meals</i> | White meat (skinless chicken, fish and pork) and non-meat meals are included on the menu at least 2 times per week<br>Non-meat meals are based on eggs, tofu or lentils/legumes | A variety of lean white/non-meat meals are included on the menu up to 4 times per fortnight<br><br>Non-meat meals are based on eggs, cheese, tofu or legumes                                                                                                                                                                         | Include a vegetarian meal on the menu at least once week                                                                                                                                                                                                                                                                                             | Included at least twice per fortnight<br><br>Based on at least one of the following protein rich foods: eggs, cheese, milk, soy products (soy beans, tofu, legumes)                                                                                                                                                                                                     | ...included on the menu at least once each fortnight for variety<br><br>Include a food containing protein such as eggs, legumes (eg chickpeas), milk, yoghurt, cheese, soy products (eg tofu) or nuts (if centre policy allows).                                                                                                                                                                                                                                           | Included at least once per fortnight<br><br>Include protein such as eggs, legumes, milk, yoghurt, cheese, soy products (e.g. tofu) or nuts ( if centre policy allows)                                                                                                                                                                                          |
|                         | Raw vegetables or fruit high in Vitamin C are served with the non-meat meal eg. Citrus fruit, tomato, broccoli, cauliflower, kiwifruit, capsicum, rockmelon.                    | On each day that a non-meat meal is served, at least 2 other iron-containing foods are included on the menu e.g wholemeal bread, breakfast cereal, dried fruit, milo<br><br>Raw vegetables or fruit high in Vitamin C are served with non-meat meal e.g. citrus fruit, tomato, broccoli, cauliflower, capsicum, kiwifruit, rockmelon | Iron containing foods to be included when serving a white meat or vegetarian dish, such as wholemeal bread, spinach, broccoli, cauliflower, beans such as baked beans and lentils<br><br>Vitamin C rich foods to be included with vegetarian meals. Eg. Capsicum, broccoli, tomato, cabbage, peas, citrus fruit, kiwifruit, rockmelon, strawberries. | Served with at least 1 other iron containing food such as .... Spinach, legumes (baked beans and lentils), wholemeal bread, broccoli, spinach, cauliflower, cabbage<br>A fruit or veg high in Vit C serves with a vegetarian meal: capsicum, broccoli, kiwi, cauli, red cabbage, citrus fruit, strawberries, rockmelon, peas, sweet potato, pineapple, tomato, zucchini | Vegetarian meals include a food containing iron such as spinach, legumes (eg chickpeas), baked beans, peas, tofu, eggs and broccoli<br><br>Vegetarian meals include a fruit or vegetable high in Vitamin C eg. Capsicum, broccoli, kiwifruit, Brussel sprouts, paw paw, cauliflower, orange, mandarin, berries, cabbage, cantaloupe, frozen or mixed vegetables, broad beans, spinach, sweet potato, potato, pineapple, cherries, raw tomato, zucchini, peas, green beans. | Served with an iron containing food such as .... Spinach, legumes, baked beans, tofu, eggs and broccoli<br><br>Include a fruit or veg high in Vit C: caps, broccoli, kiwi, Brussel sprouts, cauli, orange, mandarin, berries, cabbage, frozen mixed veg, broad beans, spinach, sweet pot, potato, pineapple, cherries, raw tomato, zucchini, peas, green beans |

|                                                  |                                                                                       |                                                                                                                                                                                                                                                  |                                                                                                                                                                                                                                                                                                                                         |                                                                                                                                                                                                                                                          |                                                                                                                               |                                                                                                                               |
|--------------------------------------------------|---------------------------------------------------------------------------------------|--------------------------------------------------------------------------------------------------------------------------------------------------------------------------------------------------------------------------------------------------|-----------------------------------------------------------------------------------------------------------------------------------------------------------------------------------------------------------------------------------------------------------------------------------------------------------------------------------------|----------------------------------------------------------------------------------------------------------------------------------------------------------------------------------------------------------------------------------------------------------|-------------------------------------------------------------------------------------------------------------------------------|-------------------------------------------------------------------------------------------------------------------------------|
| <b>Fruit</b>                                     |                                                                                       | A variety of vegetables and fruit throughout the menu is important                                                                                                                                                                               |                                                                                                                                                                                                                                                                                                                                         |                                                                                                                                                                                                                                                          | <u>Variety:</u> (1) At least 2-3 types per day;<br>(2) 5 different types per week                                             | <u>Variety:</u> (1) At least 2-3 types per day;<br>(2) 5 different types per week                                             |
|                                                  |                                                                                       | Choose tinned fruit in natural juice, not syrup                                                                                                                                                                                                  |                                                                                                                                                                                                                                                                                                                                         |                                                                                                                                                                                                                                                          | Dried fruit not offered more than once per week<br>Fruit bread is not counted towards a serve of fruit                        |                                                                                                                               |
| <b>Vegetables</b>                                |                                                                                       | A variety of vegetables and fruit throughout the menu is important                                                                                                                                                                               |                                                                                                                                                                                                                                                                                                                                         | Serve a wide variety of vegetables. Choose canned vegetables and legumes with no added salt                                                                                                                                                              | <u>Variety:</u> (1) At least 2-3 types per day;<br>(2) 5 different types per week                                             | <u>Variety:</u> (1) At least 2-3 types per day;<br>(2) 5 different types per week                                             |
| <b>Grain (cereal) foods</b>                      | High fibre varieties eg multigrain, wholemeal and high fibre white are included daily | High fibre varieties e.g. multigrain, wholemeal, high fibre white are included daily                                                                                                                                                             | Choose wholemeal/multigrain varieties where possible                                                                                                                                                                                                                                                                                    | High fibre varieties are included at least 4 times per <u>fortnight</u>                                                                                                                                                                                  | High fibre varieties (e.g. WG & WM) included 3 times per <u>week</u> , preferably every day                                   | High fibre varieties (e.g. WG & WM) included 3 times per <u>week</u> , preferably every day                                   |
|                                                  | Other breads include: pita, English muffins, raisin toast, crumpets.                  | Other breads include: pita, lavash, Turkish, Lebanese, fruit bread, scones etc.                                                                                                                                                                  | Include a variety eg pita, Lebanese, fruit loaf                                                                                                                                                                                                                                                                                         | Breads include: loaf, pita, Lebanese and fruit bread                                                                                                                                                                                                     |                                                                                                                               |                                                                                                                               |
| <b>Milk, yoghurt, cheese and/or alternatives</b> |                                                                                       | Always use full cream (full fat/regular) cow's milk until the age of 2 years.<br>After 2 years of age, reduced fat (often called "light" or "lite") milk can be used<br><br>Skim milk is not recommended for children until after 5 years of age | Cow or soy milk should not be given before 12 months of age.<br>Reduced fat dairy can be given to children 2 years of age and over. Skim milk can be given to children over 5 years of age<br>Soy milk must be fortified with calcium. Rice and oat milk are not recommended and should only be served to children under medical advice | Full cream milk should be given to children less than 2 years of age<br>Reduced fat and low fat milks (1.0-2.5% fat) are recommended for children over age of 2 years<br>Skim milk (less than 0.5%) should not be used for children under 5 years of age | Full fat varieties should be used for children less than 2 years. Reduced-fat alternatives suitable for children over 2 years | Full fat varieties should be used for children less than 2 years. Reduced-fat alternatives suitable for children over 2 years |
|                                                  |                                                                                       | Cream, sour cream and butter are not substitutes for milk, yoghurt and cheese                                                                                                                                                                    | Cream, sour cream, butte: are not substitutes for milk, yoghurt, cheese                                                                                                                                                                                                                                                                 |                                                                                                                                                                                                                                                          | Cream, sour cream, butter are not substitutes for milk, yoghurt, and cheese or alternatives                                   | Cream, sour cream, butter are not substitutes for milk, yoghurt, cheese                                                       |

|                                                |                                                                                                                              |                                                                                                                                                     |                                                                                                 |                                                                                       |                                                                                                                         |                                                                                                                                                                                                                   |
|------------------------------------------------|------------------------------------------------------------------------------------------------------------------------------|-----------------------------------------------------------------------------------------------------------------------------------------------------|-------------------------------------------------------------------------------------------------|---------------------------------------------------------------------------------------|-------------------------------------------------------------------------------------------------------------------------|-------------------------------------------------------------------------------------------------------------------------------------------------------------------------------------------------------------------|
|                                                |                                                                                                                              |                                                                                                                                                     | The menu should not include sweetened drinks (including flavoured milk)                         |                                                                                       | Flavoured milk is not an appropriate drink for young children and should not be offered                                 | Flavoured milk is not an appropriate drink for young children and should not be included                                                                                                                          |
|                                                |                                                                                                                              |                                                                                                                                                     |                                                                                                 |                                                                                       | Ensure alternative products (eg soy drinks and soy yoghurt) are calcium fortified with at least 100mg calcium per 100ml |                                                                                                                                                                                                                   |
| <b>Fats and oils</b>                           |                                                                                                                              | Ensure the margarines and oils used for cooking are rich in polyunsaturated or monounsaturated fats                                                 | Preferable to use polyunsaturated or monounsaturated fats                                       | Poly or mono unsaturated oil and/or margarine is used                                 |                                                                                                                         | Poly- or mono-unsaturated oils and spreads used in cooking & baking                                                                                                                                               |
|                                                |                                                                                                                              | Avoid using fats and oils listed under saturated fat                                                                                                |                                                                                                 |                                                                                       |                                                                                                                         | Palm oil, butter, cream ... (saturated fats) are not used in cooking                                                                                                                                              |
| <b>Salt</b>                                    |                                                                                                                              |                                                                                                                                                     |                                                                                                 |                                                                                       |                                                                                                                         | Not added to cooking or available at the table                                                                                                                                                                    |
| <b>Breakfast</b>                               |                                                                                                                              |                                                                                                                                                     | If provided, based on 1 serve breads and cereals and 1 serve dairy eg Weetbix and Milk          |                                                                                       |                                                                                                                         | If provided, based on grains and dairy                                                                                                                                                                            |
|                                                |                                                                                                                              |                                                                                                                                                     |                                                                                                 | If provided, only low sugar breakfast cereals are used - <i>not further specified</i> |                                                                                                                         | At least one WM or WG choice provided everyday<br>Breakfast cereals are low in added sugars ( <i>less than 15g/100g if dried fruit is not an ingredient; less than 25g/100g if dried fruit is an ingredient</i> ) |
| <b>Morning tea (MT) and Afternoon tea (AT)</b> | Main meals (incl MT and AT) are plotted into menu planning template                                                          | Midmeals (MT and AT) are planned on the menu as part of the total day's intake                                                                      |                                                                                                 | Snacks for MT, AT are included on the menu each day                                   |                                                                                                                         | Planned and documented on menu                                                                                                                                                                                    |
|                                                | Vegetables and fruit are offered to meet recommended number of serves.<br>Bread/cereal based foods are included if necessary | Milk, cheese, yoghurt or custard is included if necessary to meet the recommended daily serve<br>Bread/cereal based foods are included if necessary | Provide a variety of snack from each food group daily.<br>Do not include discretionary choices. |                                                                                       |                                                                                                                         | Based on foods/drinks from 5 food groups                                                                                                                                                                          |

|                                   |                                                                                                                                                           |                                                                                                                                                                                    |                                                                                                                                                                       |                                                                                                                                                         |                                                                                                                                                  |
|-----------------------------------|-----------------------------------------------------------------------------------------------------------------------------------------------------------|------------------------------------------------------------------------------------------------------------------------------------------------------------------------------------|-----------------------------------------------------------------------------------------------------------------------------------------------------------------------|---------------------------------------------------------------------------------------------------------------------------------------------------------|--------------------------------------------------------------------------------------------------------------------------------------------------|
|                                   | to meet recommended daily number of serves. Milk, cheese, yoghurt or custard is included if necessary to meet the recommended daily serve of dairy foods. | to meet the recommended daily number of serves Vegetables and fruit are included if necessary to meet the recommended daily number of serves                                       |                                                                                                                                                                       |                                                                                                                                                         |                                                                                                                                                  |
| <b>Late snack</b>                 |                                                                                                                                                           | See 'Cooking for Children and Get up and Grow resource recipes.                                                                                                                    | ...is based on everyday foods and drinks from the five food groups                                                                                                    | Baked items are not included everyday<br>Based on foods/drinks from 5 food groups                                                                       |                                                                                                                                                  |
| <b>Drinks</b>                     | Soft drinks, sugar sweetened cordials, fruit drinks and sports drinks are not included                                                                    | The menu should not include sweetened drinks (including soft drink, flavoured milk, cordial and sports drinks).                                                                    | Soft drinks, fruit drinks, cordial, sports drinks, sports waters, flavoured waters, flavoured mineral waters, iced teas and energy drinks are not offered on the menu | Soft drinks, fruit drinks, sports drinks etc.. are not included                                                                                         |                                                                                                                                                  |
|                                   | Flavoured milks are not recommended                                                                                                                       | Flavoured milk not recommended                                                                                                                                                     | Flavoured milk and fruit juice are not appropriate drinks for young children and are not offered on the menu                                                          | Flavoured milk not included                                                                                                                             |                                                                                                                                                  |
| <b>Food variety</b>               | Variety is important.                                                                                                                                     |                                                                                                                                                                                    | Each day the menu offers food of different textures, eg. chewy, soft or minced foods                                                                                  | The menu offers a variety of tastes, colours, textures and flavours                                                                                     | Menu includes variety of tastes, colours, textures and flavours                                                                                  |
|                                   | Include a variety of textures                                                                                                                             |                                                                                                                                                                                    |                                                                                                                                                                       | Main meals are not repeated in a two-week block on the menu<br>Main ingredient in a meal is not repeated on same day each week (e.g. fish every Friday) | Main meals are not repeated in a two-week menu cycle<br>Main ingredient in a meal is not repeated on same day each week (e.g. fish every Friday) |
| <b>Feeding infants under 12mo</b> |                                                                                                                                                           | BM or IF is best for babies under 12 months. Infants under the age of 6 months who are not exclusively breastfed can be offered cooled boiled water in addition to infant formula. | <i>Policy</i> lists fluids allowed for birth to age 5                                                                                                                 | BM, IF, and cooled boiled tap water are the only drinks provided to infants under 12mo                                                                  | BM, IF, and cooled boiled tap water are the only drinks provided to infants under 12mo                                                           |

|                                                     |                                                                    |                                                                                                                                                                                                                                                                   |                                                                                                                                                                                                                                                                                                                                |                                                                                                                                                                                                      |
|-----------------------------------------------------|--------------------------------------------------------------------|-------------------------------------------------------------------------------------------------------------------------------------------------------------------------------------------------------------------------------------------------------------------|--------------------------------------------------------------------------------------------------------------------------------------------------------------------------------------------------------------------------------------------------------------------------------------------------------------------------------|------------------------------------------------------------------------------------------------------------------------------------------------------------------------------------------------------|
|                                                     | For children 6 to 12 months, cooled boiled water can supplement BM | <p><i>Policy</i> lists recommended stages for introducing solids – <i>NFS</i></p> <p><i>Policy</i> documents correct storing/thawing/warming procedures for BM &amp; IF</p> <p><i>Policy states</i> supports breast milk provision and breast feeding mothers</p> | <p>From around 6mo, age-appropriate solid foods are offered</p> <p>Solid foods are an appropriate texture for infants’ developmental stages<br/>Iron rich nutritious foods are offered every day</p> <p>Fruit, vegetables, grain (cereal) foods and yoghurt or cheese are offered to infants every day in the regular menu</p> | <p>From around 6mo, age-appropriate solid foods are offered</p> <p>Solid foods are an appropriate texture for infants’ developmental stages<br/>Iron rich nutritious foods are offered every day</p> |
| <b>Foods and drinks for children with allergies</b> |                                                                    |                                                                                                                                                                                                                                                                   | <p>Children provided with suitable alternatives to foods and drinks that are not tolerated</p> <p>Foods and drinks for children with allergies are documented on the menu</p>                                                                                                                                                  | <p>Children provided with suitable alternatives to foods and drinks that are not tolerated</p> <p>Foods and drinks for children with allergies are documented on the menu</p>                        |
